# Supplementary material
Source: publisher site journal article supplement (https://static.cambridge.org/content/id/urn:cambridge.org:id:article:S0033822219000560/resource/name/S0033822219000560supp001.docx)
Supplement: Supplementary file 1 [file S0033822219000560supp001.docx]

**CAL 143 OxCal Wiggle Matching**

D_Sequence("B143")

{

R_Date("S26", 1030, 28);

Gap(1, 0);

R_Date("S27", 1008, 28);

Gap(20, 0);

R_Date("S28", 962, 28);

Gap(20, 0);

R_Date("S29", 929, 27);

Gap(20, 0);

R_Date("S30", 922, 28);

Gap(21, 0);

R_Date("S31", 980, 29);

Gap(21, 0);

R_Date("S32", 1004, 27);

Gap(21, 0);

R_Date("S33", 932, 31);

Gap(21, 0);

R_Date("S34", 914, 30);

Gap(19, 0);

R_Date("S35", 882, 29);

Gap(20, 0);

R_Date("S36", 848, 29);

Gap(20, 0);

R_Date("S37", 814, 29);

Gap(19, 0);

R_Date("S38", 819, 32);

Gap(20, 0);

R_Date("S39", 824, 30);

Gap(20, 0);

R_Date("S40", 819, 40);

Gap(21, 0);

R_Date("S41", 659, 32);

Gap(19, 0);

R_Date("S42", 591, 33);

Gap(21, 0);

R_Date("S43", 539, 29);

};

**CAL 39 OxCal Wiggle Matching**

D_Sequence("B39")

{

R_Date("S7", 959, 32);

Gap(28, 0);

R_Date("S11", 909, 30);

Gap(24, 0);

R_Date("S15", 870, 30);

};

**CAL 57 OxCal Wiggle Matching**

D_Sequence("B57")

{

R_Date("S20", 603, 31);

Gap(25, 0);

R_Date("S14", 566, 29);

Gap(25, 0);

R_Date("S18", 707, 31);

Gap(25, 0);

R_Date("S21", 587, 31);

Gap(26, 0);

R_Date("S22", 490, 30);

};

**CAL 25** **OxCal Wiggle Matching**

D_Sequence("B25")

{

R_Date("S1", 335, 30);

Gap(24, 0);

R_Date("S9", 330, 29);

Gap(25, 0);

R_Date("S2", 268, 30);

Gap(26, 0);

R_Date("S4", 336, 30);

Gap(25, 0);

R_Date("S3", 361, 30);

Gap(25, 0);

R_Date("S6", 385, 31);

Gap(25, 0);

R_Date("S10", 241, 30);

};

**CAL 152 OxCal Wiggle Matching**

D_Sequence("B152")

{

R_Date("S17", 327, 30);

Gap(30, 0);

R_Date("S13", 293, 30);

Gap(25, 0);

R_Date("S23", 345, 31);

Gap(26, 0);

R_Date("S16", 412, 30);

Gap(28, 0);

R_Date("S12", 346, 30);

Gap(25, 0);

R_Date("S24", 258, 32);

Gap(24, 0);

R_Date("S19", 208, 31);

Gap(25, 0);

R_Date("S25", 102, 30);

};
